# Supplementary material for: Hypoxia and oxidative stress induce sterile placental inflammation in vitro
Source: PubMed Central journal article supplement (PMC8012380; doi:10.1038/s41598-021-86268-1), 2021-03-31
Supplement: 41598_2021_86268_MOESM1_ESM.pdf [file 41598_2021_86268_MOESM1_ESM.pdf]

## Supplementary Information File

### Hypoxia and Oxidative Stress Induce Sterile Placental Inflammation In Vitro

Bernadette C. Baker\*<sup>1</sup>, Alexander E. P. Heazell<sup>1,2</sup>, Colin Sibley<sup>1,2</sup>, Rachael Wright<sup>1</sup>, Helen Bischof<sup>1,2</sup>, Frances Beards<sup>1,2</sup>, Tatiana Guevara<sup>1,2</sup>, Sylvie Girard<sup>3</sup>, Rebecca L. Jones<sup>1,2</sup>

<sup>1</sup>Maternal and Fetal Health Research Centre, Division of Developmental Biology and Medicine, School of Medical Sciences, Faculty of Biology, Medicine and Health, University of Manchester, Manchester Academic Health Science Centre; <sup>2</sup>St Mary's Hospital, Central Manchester NHS Foundation Trust, Manchester Academic Health Science Centre; Manchester M13 9WL, UK. <sup>3</sup>Fetomaternal and Neonatal Pathologies Research Axis, Sainte-Justine Hospital Research Center; Department of Obstetrics and Gynecology, Université de Montréal, Montréal, Québec, Canada.

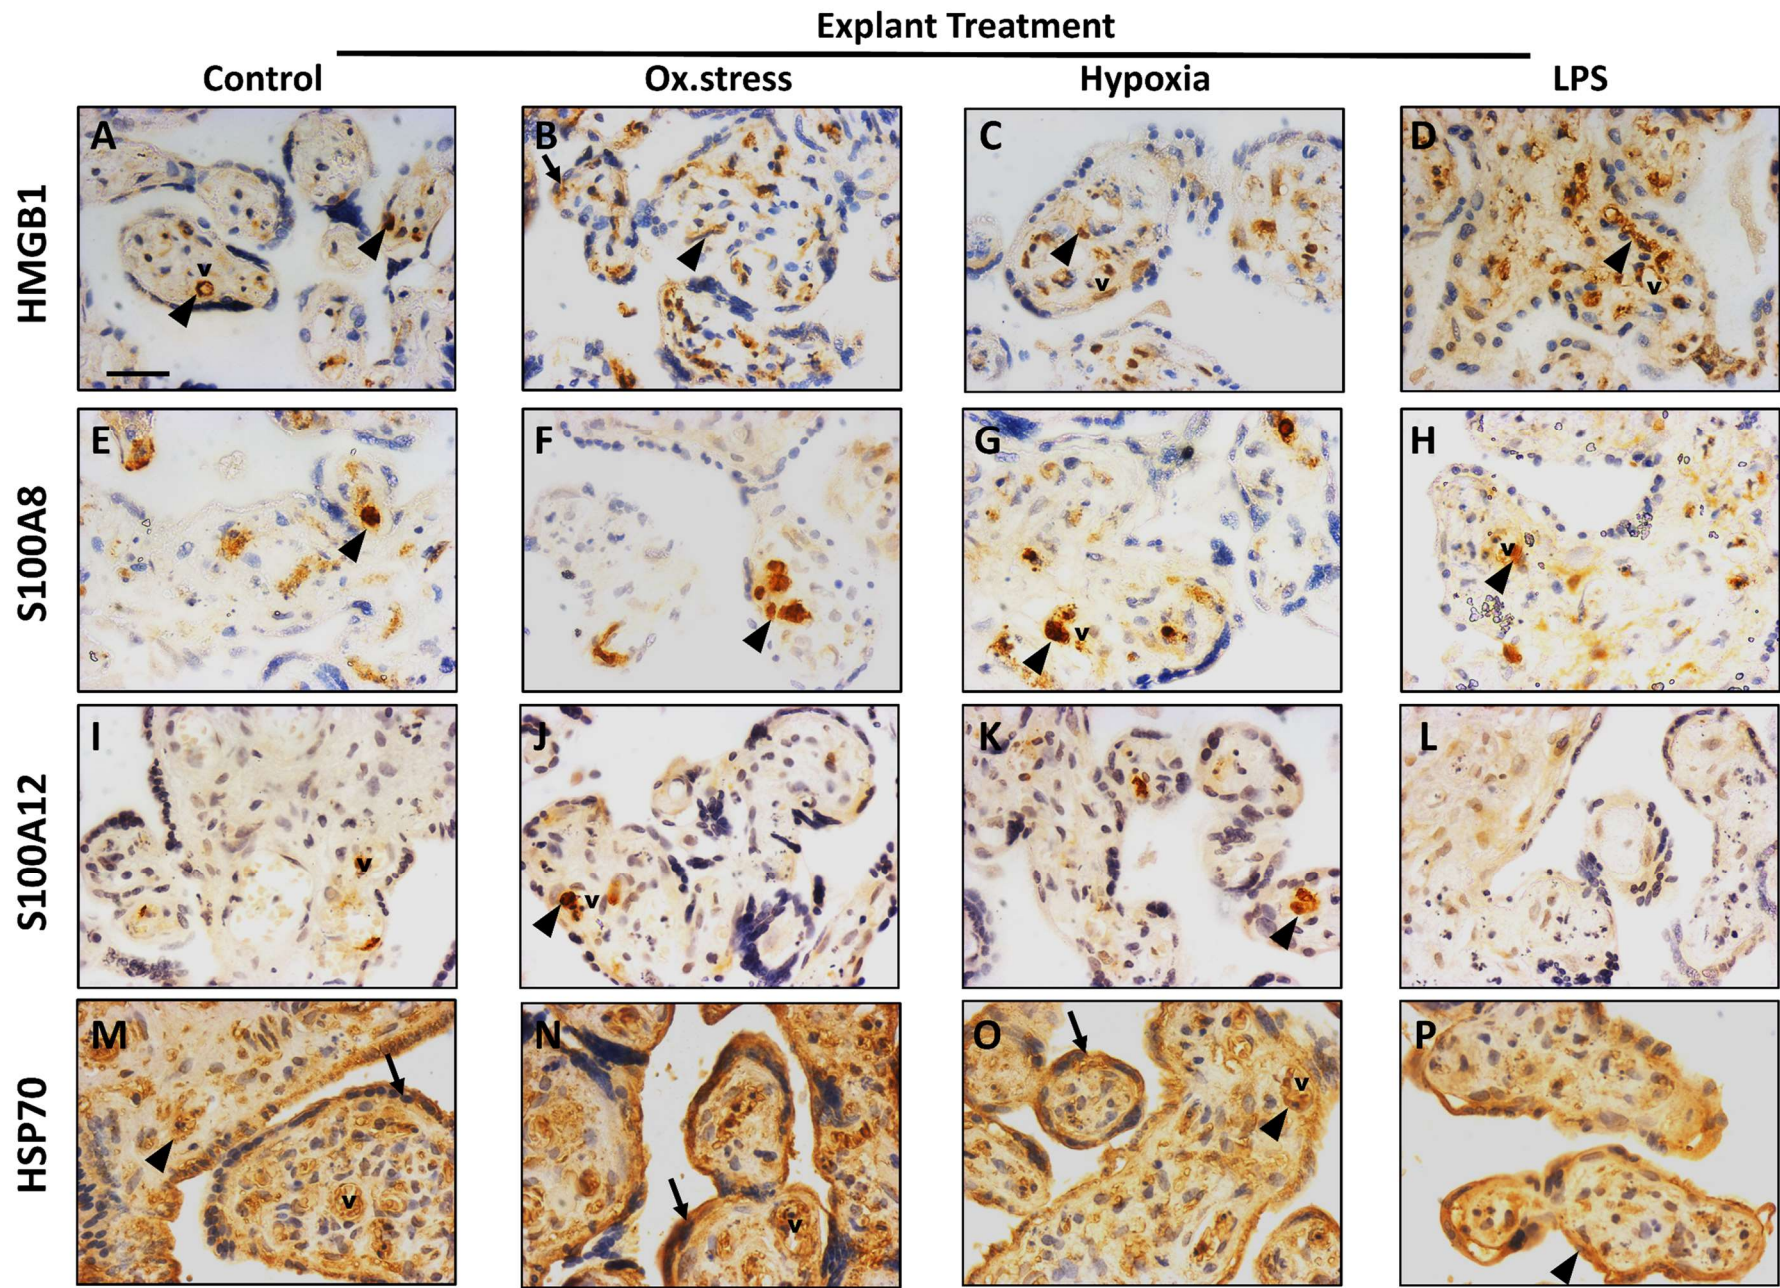

**Supplementary Figure 1. Localisation of DAMPs in placental explants cultured under control conditions or exposed to hypoxia (1% O<sub>2</sub>), oxidative stress (1mM H<sub>2</sub>O<sub>2</sub>) or LPS (1ng/ml) treatment for 72h.** Representative images from three independent experiments are shown. Magnification x400. Scale bar marked on panel A represents 25µm. Black arrow heads indicate representative positive stromal cells, black arrows show representative positive trophoblast cells, v = vessels.

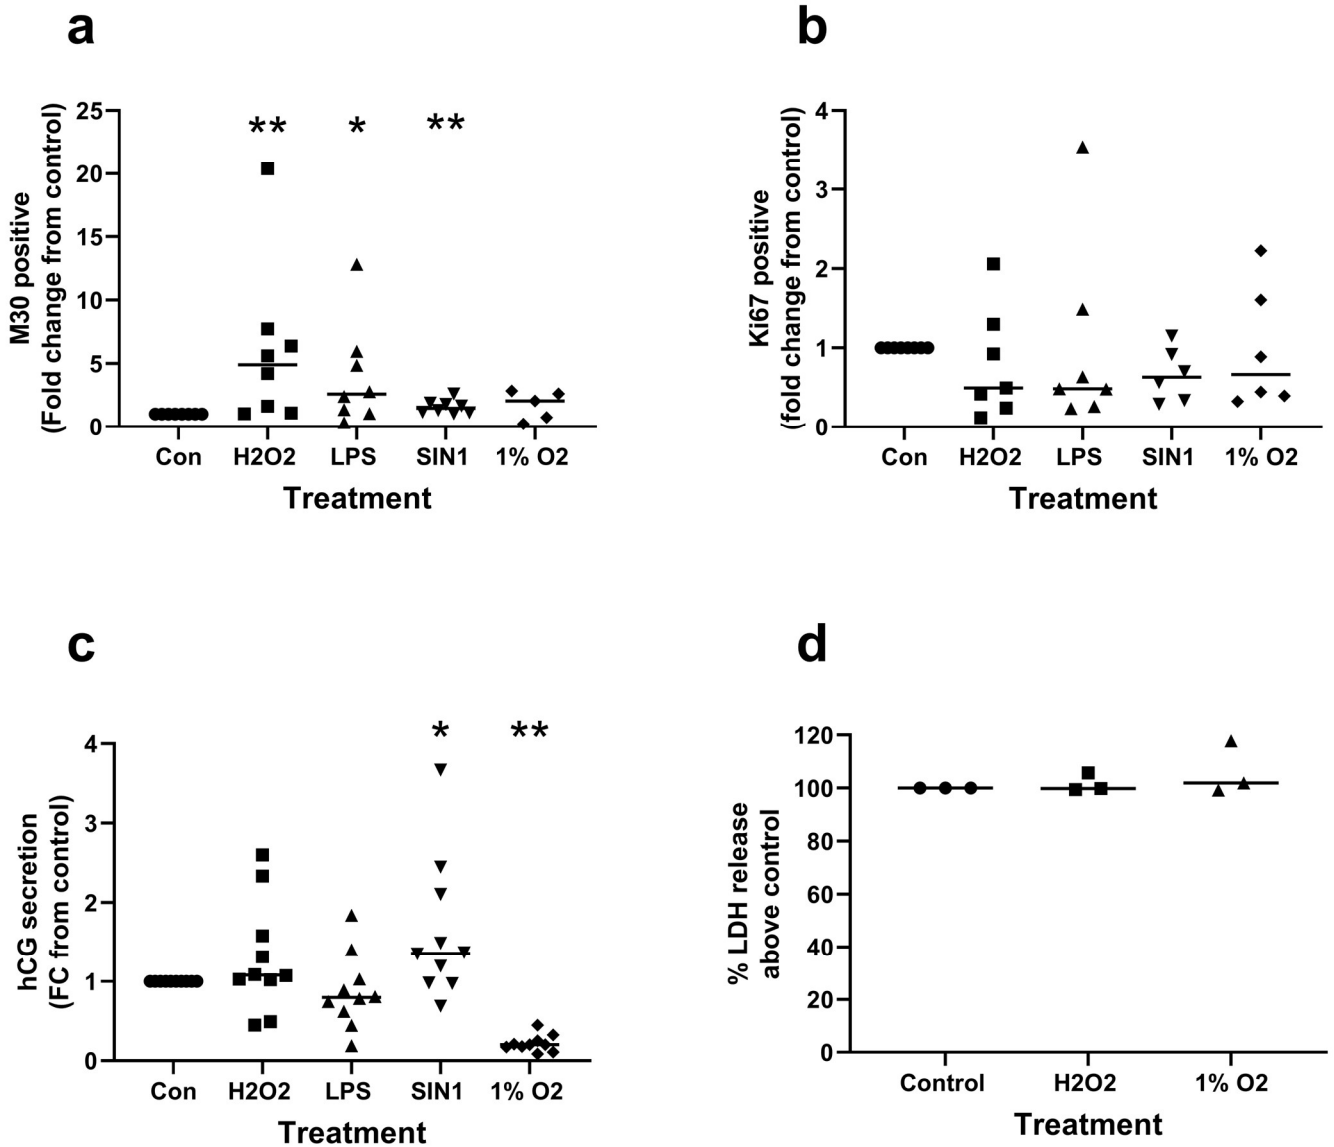

**Supplementary Figure 2. Markers of tissue viability measured in placental explants exposed for 72hr to oxidative stress (H<sub>2</sub>O<sub>2</sub>), LPS, nitrate stress (SIN1) and hypoxia (1% O<sub>2</sub>).** Placental explants were examined for markers of cell apoptosis and proliferation by IHC, hormone secretion by ELISA and cell necrosis using an LDH assay a) M30+ cells, n=5-8 placentas b) Ki67+ cells, n=6-7 placentas c) hCG secretion, n=10 placentas d) LDH release, n=3 placentas. All data were normalised to control. Line represents media, \*p<0.05, \*\*p<0.01 Wilcoxon signed rank test.

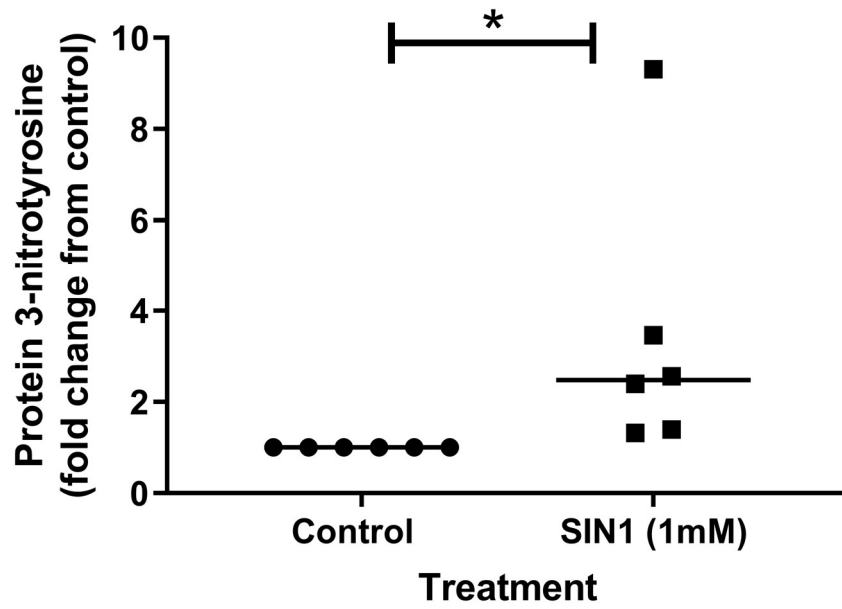

**Supplementary Figure 3. Production of protein 3-nitrotyrosine residues in placental explants exposed to 1mM SIN1.** Cell lysates from explants were quantitated by ELISA for 3-nitrotyrosine in proteins. n=6 placentas. Data were expressed as fold change from control. Line represents median, \*p<0.05 Wilcoxon signed rank test.

| Study authors                           | Model                                                                    | Conditions                                                                                                  | DAMP/Cytokine investigated               | Findings                                                                                                                                                                                                                                                 |
|-----------------------------------------|--------------------------------------------------------------------------|-------------------------------------------------------------------------------------------------------------|------------------------------------------|----------------------------------------------------------------------------------------------------------------------------------------------------------------------------------------------------------------------------------------------------------|
| Tjoa et al, 2006 <sup>1</sup>           | Term villous explants (20h culture)                                      | Hypoxia/reoxygenation (H/R) (0.5% for 1hr followed by normoxia (10%) for 6 or 19h +/- vit C or E            | cfDNA                                    | cell-free DNA in supernatant significantly ↑ at 20h hours after H/R.<br>Associated with ↑ STB apoptosis and necrosis.<br>cell-free DNA release and apoptosis significantly ↓ by antioxidant vitamins C and E                                             |
| Cindrova-Davis et al, 2007 <sup>2</sup> | Term villous explants (16h culture)                                      | Hypoxia/reoxygenation (0.5% for 1hr followed by normoxia (10%) for 6 or 15h +/- vit C or E or p38 inhibitor | TNFα/IL1β                                | p38 MAPK and NFκB pathways activated. Oxid stress markers detected<br>↑ release and tissue content TNFα and tissue content only of IL1β, <u>release</u> not measured<br>↑ COX-2 protein expression<br>↑ apoptosis. Vit C and E blocked all these effects |
| Tskitishvili et al, 2010 <sup>3</sup>   | Term villous explants and amnion 2 or 6h                                 | Oxidative stress (HNE, NaF, X/XO)                                                                           | S100B                                    | ↑ S100B release from villous explants and amnion cultures                                                                                                                                                                                                |
| Jiang et al, 2014 <sup>4</sup>          | 1 <sup>st</sup> trimester primary mouse trophoblast JEG-3 cells          | Hypoxia (1% O <sub>2</sub> ) vs 21%<br>Up to 48h                                                            | HMGB1                                    | ↑ mRNA at 24h in PMT+JEG3 in hypoxia<br>↑ release and intracellular protein at 24 and 48h hypoxia both cell types                                                                                                                                        |
| Collett et al, 2018 <sup>5</sup>        | BeWo cells                                                               | ER stress (Tunicamycin or Thapsigargin)                                                                     | HMGB1/HSP70/Histone H3 (EV release only) | ↑ EV-associated high mobility group protein B1 (HMGB1), heat shock protein 70 (hsp70) and histone H3 released from severely ER-stressed cells<br>Antioxidant PTDC abolished EV associated DAMP release                                                   |
| Nunes et al, 2018 <sup>6</sup>          | Term villous explants (24h stabilisation followed by 4 or 24h treatment) | H <sub>2</sub> O <sub>2</sub> (100 or 1000μM) +/- Glybenclamide (NLRP3 inflammasome blocker)                | HSP70/IL1β/TNFα/IL10                     | ↑ Release HSP70/IL1β/hCG/SOD/Catalase at 1mM<br>↑ mRNA caspase 1/IL1β/TNFα<br>↓ mRNA and protein IL10 release<br>Glybenclamide reduced NLRP3 + IL1β mRNA and caspase 1 release                                                                           |

**Supplementary Table 1.** Summary of previous placental *in vitro* studies on DAMPs/Cytokines

| Treatment              | Control<br>(H <sub>2</sub> O <sub>2</sub> , LPS, SIN-1) | Oxidative<br>stress<br>(1mM H <sub>2</sub> O <sub>2</sub> ) | LPS control<br>(1ng/ml) | Nitrative<br>stress<br>(1mM SIN-1) | Control<br>(Hypoxia only) | Hypoxia<br>(1% O <sub>2</sub> ) |
|------------------------|---------------------------------------------------------|-------------------------------------------------------------|-------------------------|------------------------------------|---------------------------|---------------------------------|
| Uric acid (M) [μM/mg]  | 20.6 (11 – 42.1)                                        | 18.4 (16 – 48.6) *                                          | 20.3 (16.4 – 71.6) *    | 25.1 (15.9 – 35.8)                 | 0.22 (0.16 – 2.9)         | 0.94 (0.2 – 5.5) *              |
| Uric acid (L) [μM/mg]  | 16.7 (4.4 – 80.9)                                       | 50.3 (16 – 48.6)                                            | 38.7 (30.1 – 68)        | 3.2 (1.3 – 5.2) *                  | 29.4 (12.4 – 60.2)        | 29.7 (16.6 – 50.6)              |
| HMGB1 (M) [ng/ml/mg]   | 6.6 (2.3 – 143)                                         | 20.1 (7.6 – 179) **                                         | 32.8 (7.3 – 273) **     | 4.3 (0.87 – 12.2)                  | 5.4 (3.2 – 26.8)          | 14 (8 – 27) *                   |
| HMGB1 (L) [ng/ml/mg]   | 147 (99.5 – 318)                                        | 265 (96 – 414) *                                            | 181 (89 – 350)          | 125 (102 – 162) **                 | 507 (269 – 949)           | 241 (79.9 – 809) **             |
| cffDNA (M) [ng/μl/mg]  | 4.5 (1.6 – 10.4)                                        | 4.7 (2.9 – 14.8) *                                          | 3.3 (2.3 – 18.4)        | 10.5 (835 – 14.0)                  | 3.1 (1.6 – 5.3)           | 2.6 (1.9 – 4.0)                 |
| S100A8 (M) [pg/ml/mg]  | 1.3 (0.16 – 10.4)                                       | 4.5 (0.6 – 40.4) **                                         | 4.3 (1.4 – 23) *        | 0.7 (0.3 – 1.7)                    | 0.17 (0.06 – 0.25)        | 0.2 (0.04 – 0.3)                |
| S100A8 (L) [pg/ml/mg]  | 288 (126 – 761)                                         | 290 (132.5 – 669)                                           | 253 (181 – 320)         | 359 (220 – 695)                    | 1069 (238 – 1461)         | 960 (200 – 2182)                |
| S100A12 (M) [pg/ml/mg] | 105 (6.7 – 393)                                         | 113.5 (63.6 – 320.1)                                        | 156 (52.3 – 451)        | 67.9 (49.5 – 154)                  | 6.8 (4 – 7.25)            | 7.86 (4.4 – 13) *               |
| S100A12 (L) [pg/ml/mg] | 2.0 (0.34 – 47.9)                                       | 1.02 (0.19 – 3.1)                                           | 0.55 (0.23 – 4.3)       | 4.3 (0.7 – 13.9)                   | 20.4 (0.85 – 47.7)        | 24 (0.4 – 57.5) *               |
| HSP70 (M) [ng/ml/mg]   | 4.9 (0.3 – 35.9)                                        | 7.6 (3.0 – 58.2)                                            | 10 (2.4 – 41.2) *       | 6.31 (4.8 – 8.2)                   | 0.29 (0.16 – 0.37)        | 0.45 (0.22 – 0.58) **           |
| HSP70 (L) [ng/ml/mg]   | 16.3 (7.7 – 23.6)                                       | 14.3 (8.5 – 27)                                             | 16.2 (13.2 – 27.8)      | 16.1 (13.5 – 18.9)                 | 28.1 (16.3 – 39.9)        | 27.8 (8.2 – 70.1)               |

**Supplementary Table 2: Summary of absolute DAMPs concentrations detected in media and lysates of placental explants treated with pathological insults.** (M) denotes media and (L) tissue lysate. Values are Median with range bracketed. Stars denote level of significance (\*p<0.05, \*\*p<0.01; Wilcoxon signed rank test) as determined once normalised to control.

| Treatment        | Control<br>(H <sub>2</sub> O <sub>2</sub> , LPS, SIN-1) | Oxidative stress<br>(1mM H <sub>2</sub> O <sub>2</sub> ) | LPS<br>(1ng/ml)           | Nitrative stress<br>(1mM SIN-1) | Control<br>(Hypoxia only) | Hypoxia<br>(1% O <sub>2</sub> ) |
|------------------|---------------------------------------------------------|----------------------------------------------------------|---------------------------|---------------------------------|---------------------------|---------------------------------|
| IL1 $\alpha$ (M) | 1.5 (0.16 – 48.8)                                       | 7.9 (1.2 – 55.3) **                                      | 17.6 (2.1 – 143.5) **     | 0.81 (0.1 – 1.75)               | 1.6 (0.37 – 8.7)          | 8 (0.76 – 27.8) **              |
| IL1 $\alpha$ (L) | 46.5 (0.9 – 136.4)                                      | 7.6 (2.0 – 249.5) **                                     | 10.8 (6.7- 369.2) **      | 80.2 (25 – 155.9)               | 166.3 (79.5 – 537)        | 387.4 (114.6 – 1160) *          |
| IL1 $\beta$ (M)  | 0.38 (0.09 – 21.4)                                      | 0.94 (0.18 – 53.8) *                                     | 4.2 (1.3 – 90) **         | 0.2 (0.03 – 0.64)               | 5.0 (0.9 – 12.2)          | 6.6 (0.7 – 38.1)                |
| IL1 $\beta$ (L)  | 10.1 (1.5 – 34.1)                                       | 12.3 (3.6 – 70.2) *                                      | 23.1 (12.9 – 91.2) **     | 17.4 (5.8 – 26.5)               | 148 (50.5 – 383)          | 332.8 (73.9 – 758) *            |
| IL1Ra (M)        | 114 (5.4 – 305.1)                                       | 144.6 (28.6 – 507.8)                                     | 239 (54 – 910)            | 8.7 (1.75 – 65.3)               | 121 (61.8 – 539)          | 180.6 (56.3 – 542.6)            |
| IL1Ra (L)        | 2,582 (659 – 6,188)                                     | 3,154 (645 – 32,957)                                     | 8,021 (630 – 49,638) **   | 1,261 (338 – 1,788)             | 16,291 (12,521 – 44,142)  | 14,604 (7,613 – 52,678)         |
| TNF $\alpha$ (M) | 3.6 (0.3 – 323)                                         | 8.5 (2.2 – 134)                                          | 86.3 (8.8 – 550) **       | 2.0 (0.75 – 3.6)                | 5.5 (1.7 – 24.3)          | 4.1 (1.2 – 45.2)                |
| TNF $\alpha$ (L) | 112 (8.3 – 281)                                         | 78.8 (6.6 – 499) *                                       | 259 (17.3 – 738) **       | 160.5 (4.5 – 312)               | 10.5 (4.8 – 14.1)         | 15.9 (6.1 – 23.6) *             |
| IL6 (M)          | 1,277 (439 – 1,061)                                     | 2,702 (1,412 – 14,850) **                                | 5,627 (1,485 – 10,011) ** | 1,009 (723 – 1,767)             | 2,210 (958 – 4,128)       | 4,094 (1,570 – 5,630) *         |
| IL6 (L)          | 290 (51.1 – 1,061)                                      | 236 (103 – 911) **                                       | 191 (141 – 1,444) *       | 425 (142 – 612) **              | 1,047 (256 – 1,660)       | 2,043 (843 – 3,210) *           |
| IL8 (M)          | 5,263 (3,289 – 11,815)                                  | 7,260 (3,689 – 10,810) *                                 | 5,750 (3,418 – 7,586) *   | 4,669 (3,399 – 5,749)           | 1,204 (509.5 – 1651)      | 1,562 (781 – 2,772) *           |
| IL8 (L)          | 1,616 (1,259 – 3,130)                                   | 2,563 (1,217 – 3,814) *                                  | 2,127 (1,198 – 2,733)     | 1,411 (826 – 1,651) *           | 7,662 (3,000 – 12,463)    | 9,792 (3,761 – 25,615) **       |
| CCL2 (M)         | 7,605 (546 – 15,403)                                    | 7,731 (550 – 22,239) *                                   | 9,221 (5,042 – 24,730) *  | 5,505 (2,621 – 9,056) **        | 760 (302 – 1,191)         | 209 (94 – 651) **               |
| CCL2 (L)         | 3,620 (1,532 – 7,329)                                   | 6,227 (1,919 – 14,646) **                                | 7,108 (2,437 – 12,785) ** | 2,435 (1,224 – 2,849)           | 4,021 (2,668 – 6,455)     | 2,287 (1,331 – 4,179)           |
| IL10 (M)         | 38.8 (9.9 – 75.6)                                       | 41.3 (16 – 127)                                          | 89.9 (37.5 – 282) **      | 29.3 (12.3 – 37) **             | 0.98 (0.7 – 1.69)         | 0.55 (0.22 – 1.12) **           |
| IL10 (L)         | 456 (158 – 1,919)                                       | 395 (109 – 999)                                          | 370 (113 – 776)           | 1,031 (157 – 1,530)             | 1,220 (65 – 2,471)        | 1,482 (43 – 3,142)              |

**Supplementary Table 3: Summary of absolute cytokine concentrations detected in media and lysates of placental explants treated with pathological insults.** (M) denotes media and (L) tissue lysate. Values are Median with range bracketed All cytokine concentrations are pg/ml/mg protein. Stars denote level of significance (\*p<0.05, \*\*p<0.01; Wilcoxon signed rank test) as determined once normalised to control.

## References

- 1 Tjoa, M. L., Cindrova-Davies, T., Spasic-Boskovic, O., Bianchi, D. W. & Burton, G. J. Trophoblastic oxidative stress and the release of cell-free fetoplacental DNA. *The American journal of pathology* **169**, 400-404, doi:10.2353/ajpath.2006.060161 (2006).
- 2 Cindrova-Davies, T., Spasic-Boskovic, O., Jauniaux, E., Charnock-Jones, D. S. & Burton, G. J. Nuclear factor-kappa B, p38, and stress-activated protein kinase mitogen-activated protein kinase signaling pathways regulate proinflammatory cytokines and apoptosis in human placental explants in response to oxidative stress: effects of antioxidant vitamins. *The American journal of pathology* **170**, 1511-1520, doi:10.2353/ajpath.2007.061035 (2007).
- 3 Tskitishvili, E. *et al.* Oxidative stress-induced S100B protein from placenta and amnion affects soluble Endoglin release from endothelial cells. *Molecular human reproduction* **16**, 188-199, doi:10.1093/molehr/gap104 (2010).
- 4 Jiang, R. *et al.* Hypoxic trophoblast HMGB1 induces endothelial cell hyperpermeability via the TLR-4/caveolin-1 pathway. *Journal of immunology* **193**, 5000-5012, doi:10.4049/jimmunol.1303445 (2014).
- 5 Collett, G. P., Redman, C. W., Sargent, I. L. & Vatish, M. Endoplasmic reticulum stress stimulates the release of extracellular vesicles carrying danger-associated molecular pattern (DAMP) molecules. *Oncotarget* **9**, 6707-6717, doi:10.18632/oncotarget.24158 (2018).
- 6 Nunes, P. R. *et al.* Hydrogen peroxide-mediated oxidative stress induces inflammasome activation in term human placental explants. *Pregnancy hypertension* **14**, 29-36, doi:10.1016/j.preghy.2018.07.006 (2018).
